# Supplementary material for: Riparian evapotranspiration shapes stream flow dynamics and water budgets in a Mediterranean catchment
Source: Copernicus journal article supplement (doi:10.5194/hess-2017-735), 2018-01-02
Supplement: Supplementary file 1 [file hess-2017-735-supplement.pdf]

## Supplementary Figures and Tables

645 **Table S1** List of the model parameters that were allowed to vary during Monte Carlo simulations. All parameters varied by  $\pm 25\%$  in relation to the optimal values obtained during manual calibration. The sensitivity of stream flow model performance to evapotranspiration (ET) was assessed by fixing evapotranspiration-related parameters in a second round of Monte Carlo simulations. In this second round, the mean of the best values obtained for the three forest types were used as fixed values.

| Parameter                                                               | Units                                 | Best | Min   | Max   | ET sensitivity analysis |
|-------------------------------------------------------------------------|---------------------------------------|------|-------|-------|-------------------------|
| a (flow velocity multiplier) at <i>upstream location</i>                | m <sup>-2</sup>                       | 0.10 | 0.075 | 0.13  |                         |
| a (flow velocity multiplier) at <i>midstream location</i>               | m <sup>-2</sup>                       | 0.10 | 0.075 | 0.13  |                         |
| a (flow velocity multiplier) at <i>downstream location</i>              | m <sup>-2</sup>                       | 0.10 | 0.075 | 0.13  |                         |
| b (flow velocity exponent) at <i>upstream location</i>                  | -                                     | 0.70 | 0.525 | 0.875 |                         |
| b (flow velocity exponent) at <i>midstream location</i>                 | -                                     | 0.70 | 0.525 | 0.875 |                         |
| b (flow velocity exponent) at <i>downstream location</i>                | -                                     | 0.70 | 0.525 | 0.875 |                         |
| Rain multiplier for <i>Upland Evergreen</i>                             | -                                     | 0.80 | 0.60  | 1.00  |                         |
| Rain multiplier for <i>Upland Deciduous</i>                             | -                                     | 1.10 | 0.825 | 1.375 |                         |
| Rain multiplier for <i>Riparian Evergreen</i>                           | -                                     | 0.80 | 0.60  | 1.00  |                         |
| Rain multiplier for <i>Riparian Deciduous</i>                           | -                                     | 1.10 | 0.825 | 1.375 |                         |
| Degree day evapotranspiration for <i>Upland Evergreen</i>               | mm °C <sup>-1</sup> day <sup>-1</sup> | 0.35 | 0.263 | 0.437 | Fixed to 0.375          |
| Degree day evapotranspiration for <i>Upland Deciduous</i>               | mm °C <sup>-1</sup> day <sup>-1</sup> | 0.40 | 0.3   | 0.5   | Fixed to 0.375          |
| Degree day evapotranspiration for <i>Riparian Evergreen</i>             | mm °C <sup>-1</sup> day <sup>-1</sup> | 0.35 | 0.263 | 0.437 | Fixed to 0.375          |
| Degree day evapotranspiration for <i>Riparian Deciduous</i>             | mm °C <sup>-1</sup> day <sup>-1</sup> | 0.40 | 0.3   | 0.5   | Fixed to 0.375          |
| Growing degree threshold for <i>Upland Evergreen</i>                    | °C                                    | 3    | 2.25  | 3.75  | Fixed to 4              |
| Growing degree threshold for <i>Upland Deciduous</i>                    | °C                                    | 5    | 3.75  | 6.25  | Fixed to 4              |
| Growing degree threshold for <i>Riparian Evergreen</i>                  | °C                                    | 3    | 2.25  | 3.75  | Fixed to 4              |
| Growing degree threshold for <i>Riparian Deciduous</i>                  | °C                                    | 5    | 3.75  | 6.25  | Fixed to 4              |
| Canopy interception for <i>Upland Evergreen</i>                         | mm day <sup>-1</sup>                  | 0.75 | 0.562 | 0.937 |                         |
| Canopy interception for <i>Upland Deciduous</i>                         | mm day <sup>-1</sup>                  | 1    | 0.75  | 1.25  |                         |
| Canopy interception for <i>Riparian Evergreen</i>                       | mm day <sup>-1</sup>                  | 0.75 | 0.562 | 0.937 |                         |
| Canopy interception for <i>Riparian Deciduous</i>                       | mm day <sup>-1</sup>                  | 1    | 0.75  | 1.25  |                         |
| Drought runoff fraction for <i>Upland Evergreen, Soil layer</i>         | -                                     | 0.1  | 0.075 | 0.125 |                         |
| Drought runoff fraction for <i>Upland Deciduous, Soil layer</i>         | -                                     | 0.2  | 0.15  | 0.25  |                         |
| Time constant for <i>Upland Evergreen, Quick layer</i>                  | days                                  | 1.3  | 0.975 | 1.625 |                         |
| Time constant for <i>Upland Deciduous, Quick layer</i>                  | days                                  | 1.7  | 1.275 | 2.125 |                         |
| Time constant for <i>Riparian Evergreen, Quick layer</i>                | days                                  | 1.3  | 0.975 | 1.625 |                         |
| Time constant for <i>Riparian Deciduous, Quick layer</i>                | days                                  | 1.7  | 1.275 | 2.125 |                         |
| Time constant for <i>Upland Evergreen, Soil layer</i>                   | days                                  | 2.5  | 1.875 | 3.125 |                         |
| Time constant for <i>Upland Deciduous, Soil layer</i>                   | days                                  | 2.5  | 1.875 | 3.125 |                         |
| Time constant for <i>Riparian Evergreen, Soil layer</i>                 | days                                  | 5    | 3.75  | 6.25  |                         |
| Time constant for <i>Riparian Deciduous, Soil layer</i>                 | days                                  | 5    | 3.75  | 6.25  |                         |
| Time constant for <i>Evergreen, Groundwater layer</i>                   | days                                  | 70   | 52.5  | 87.5  |                         |
| Time constant for <i>Deciduous, Groundwater layer</i>                   | days                                  | 100  | 75    | 125   |                         |
| Evapotranspiration adjustment for <i>Upland Evergreen, Soil layer</i>   | -                                     | 0.75 | 0.562 | 0.937 | Fixed to 0.625          |
| Evapotranspiration adjustment for <i>Upland Deciduous, Soil layer</i>   | -                                     | 0.5  | 0.375 | 0.625 | Fixed to 0.625          |
| Evapotranspiration adjustment for <i>Riparian Evergreen, Soil layer</i> | -                                     | 0.75 | 0.562 | 0.937 | Fixed to 0.625          |
| Evapotranspiration adjustment for <i>Riparian Deciduous, Soil layer</i> | -                                     | 0.5  | 0.375 | 0.625 | Fixed to 0.625          |

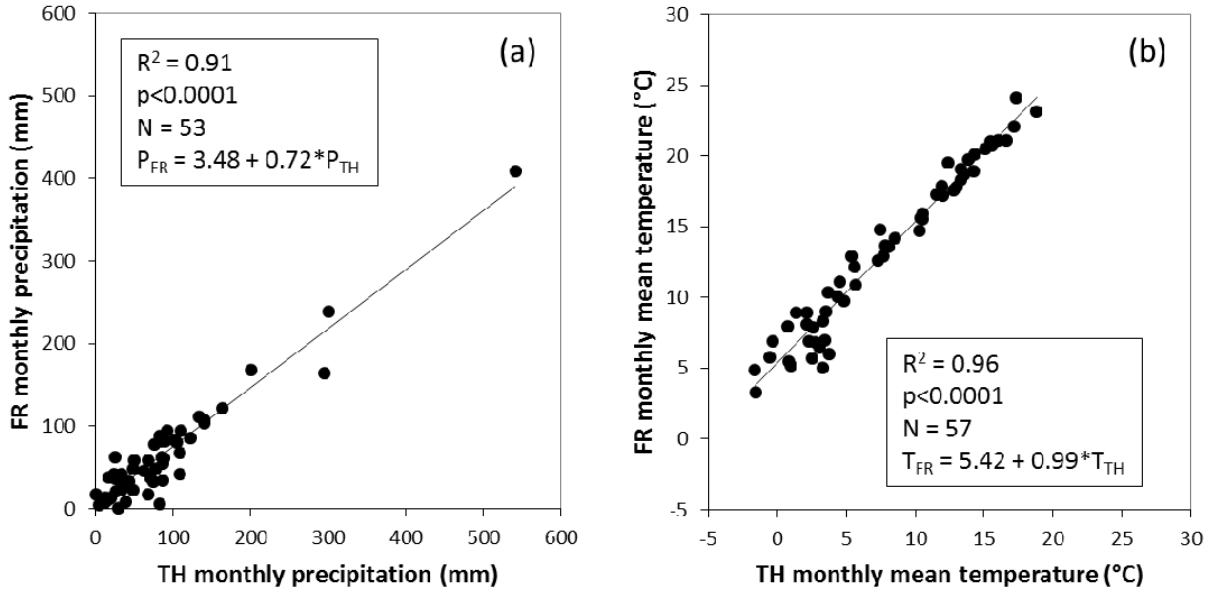

**Figure S1** Linear regression between Font del Regàs (FR) and Turó de l'Home (TH) monthly precipitation (a) and monthly mean temperature (b) for the period 2010-2014. The obtained linear models were used to estimate daily precipitation (P) and temperature (T) at FR for the reference period (1981-2000). We assumed that the occurrence of days with  $P = 0$  was equal between TH and FR. When  $P > 0$  at TH, P at FR was estimated by dividing the intercept of the model equation by the number of days with  $P > 0$  in that month, and adding the product of the model slope and the precipitation at TH (i.e.  $P$  at FR =  $3.48/\text{number of rainy days in the month} + 0.72 \times P_{TH}$ ). Daily P and T at FR for the future period (2081–2100) were constructed from the estimated values at the reference period using the IPCC scenarios as described in the main manuscript.

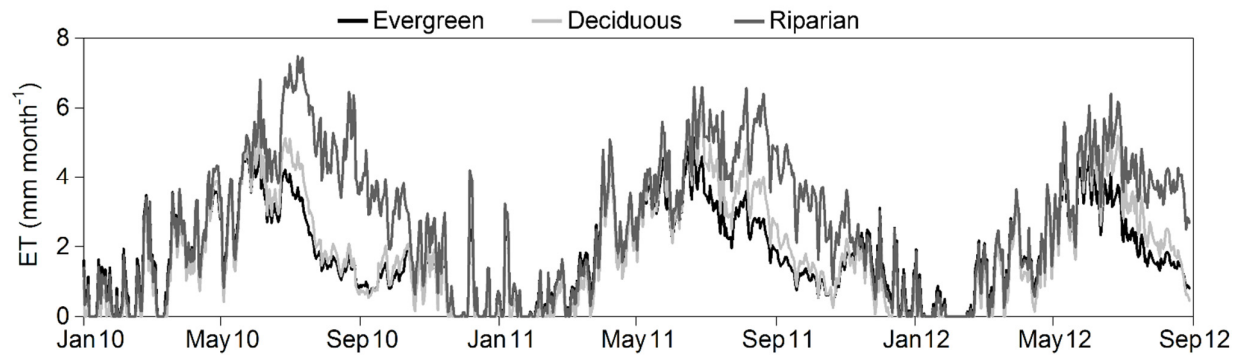

**Figure S2** Daily values of simulated evapotranspiration (ET) in the evergreen (black), deciduous (grey), and riparian (dark grey) forests during the period January 2010–August 2012.
